# Supplementary material for: Independent theta phase coding accounts for CA1 population sequences and enables flexible remapping
Source: eLife journal article supplement (doi:10.7554/elife.03542), 2015-02-02
Supplement: supp [file elife-03542-supp-v1.zip]

Archive with 12 entries (12 files):
- elife_poa_e03542_Figure_4_figure_supplement_2.tif
- elife_poa_e03542_Figure_7_figure_supplement_1.tif
- elife_poa_e03542_Figure_2_figure_supplement_1.tif
- elife_poa_e03542_Figure_4_figure_supplement_1.tif
- elife_poa_e03542_Video_2.avi
- elife_poa_e03542_Figure_3_figure_supplement_1.tif
- elife_poa_e03542_Figure_5_figure_supplement_2.tif
- elife_poa_e03542_Figure_5_figure_supplement_1.tif
- elife_poa_e03542_Video_1.avi
- elife_poa_e03542_Source_Code.bib
- elife_poa_e03542_Figure_6_figure_supplement_1.tif
- elife_poa_e03542_Supplementary_File_1.pdf
